# Supplementary material for: The effect of water molecules upon the hydrogen-bonding cooperativity of three-stranded antiparallel β-sheet models
Source: Royal Society of Chemistry journal article supplement (doi:10.1039/c3ra45892j), 2013-12-03
Supplement: c3ra45892j.pdf [file c3ra45892j.pdf]

**Supporting Information for:**

**The effect of water molecules upon the hydrogen-bonding cooperativity of three-stranded antiparallel  $\beta$ -sheet models**

Chang-Liang Sun<sup>1\*</sup>, Fu Ding<sup>1</sup>, Yan-Li Ding<sup>2</sup>, Yang Li<sup>3</sup>

- (1. Center of Physical Chemistry Test, Shenyang University of Chemical Technology, Shenyang 110142, P. R. China)
- (2. Department of Mathematics and Physics, Shenyang University of Chemical Technology, Shenyang 110142, P. R. China)
- (3. Department of Chemistry, The Hong Kong University of Science and Technology, Clear Water Bay, Kowloon, Hong Kong, People's Republic of China)

---

\* Author to whom correspondence should be addressed. Email: chemscl@126.com

**All of the optimized geometrical coordinates of the ten three-stranded antiparallel diglypeptide  $\beta$ -sheet models at the MP2/6-31G\*\* level.**

**A:**

|   |   |           |           |           |
|---|---|-----------|-----------|-----------|
| 7 | 0 | 4.836726  | 1.963861  | 0.000000  |
| 6 | 0 | 4.268024  | 3.186779  | 0.000000  |
| 8 | 0 | 4.886681  | 4.262120  | 0.000000  |
| 6 | 0 | 2.743302  | 3.160823  | 0.000000  |
| 7 | 0 | 2.274341  | 4.523785  | 0.000000  |
| 6 | 0 | 0.962553  | 4.815885  | 0.000000  |
| 8 | 0 | 0.090688  | 3.927034  | 0.000000  |
| 6 | 0 | 0.597180  | 6.281357  | 0.000000  |
| 6 | 0 | 6.274784  | 1.791746  | 0.000000  |
| 1 | 0 | 4.225606  | 1.152790  | 0.000000  |
| 1 | 0 | 2.379441  | 2.616764  | 0.871963  |
| 1 | 0 | 2.379441  | 2.616764  | -0.871963 |
| 1 | 0 | 3.001553  | 5.227500  | 0.000000  |
| 1 | 0 | 1.466790  | 6.934331  | 0.000000  |
| 1 | 0 | -0.008923 | 6.489589  | -0.879194 |
| 1 | 0 | -0.008923 | 6.489589  | 0.879194  |
| 1 | 0 | 6.600505  | 1.248384  | 0.886451  |
| 1 | 0 | 6.600505  | 1.248384  | -0.886451 |
| 1 | 0 | 6.725063  | 2.779507  | 0.000000  |
| 7 | 0 | 0.497576  | -0.643563 | 0.000000  |
| 6 | 0 | 1.828410  | -0.849650 | 0.000000  |
| 8 | 0 | 2.633645  | 0.102661  | 0.000000  |
| 6 | 0 | 0.000000  | 0.710195  | 0.000000  |
| 6 | 0 | -1.520411 | 0.727365  | 0.000000  |
| 8 | 0 | -2.190376 | -0.319108 | 0.000000  |
| 7 | 0 | -2.031490 | 1.974074  | 0.000000  |
| 6 | 0 | 2.296525  | -2.282480 | 0.000000  |
| 6 | 0 | -3.453627 | 2.246796  | 0.000000  |
| 1 | 0 | -0.168746 | -1.409247 | 0.000000  |
| 1 | 0 | 0.366681  | 1.257711  | 0.870133  |
| 1 | 0 | 0.366681  | 1.257711  | -0.870133 |
| 1 | 0 | -1.381045 | 2.754396  | 0.000000  |
| 1 | 0 | 1.463455  | -2.976969 | 0.000000  |
| 1 | 0 | 2.918323  | -2.442606 | -0.879121 |
| 1 | 0 | 2.918323  | -2.442606 | 0.879121  |
| 1 | 0 | -3.736538 | 2.813487  | -0.886387 |
| 1 | 0 | -3.736538 | 2.813487  | 0.886387  |
| 1 | 0 | -3.982232 | 1.300498  | 0.000000  |
| 7 | 0 | -1.009749 | -5.739694 | 0.000000  |
| 6 | 0 | -1.510594 | -4.477441 | 0.000000  |
| 8 | 0 | -0.805882 | -3.460318 | 0.000000  |
| 6 | 0 | -3.027279 | -4.437047 | 0.000000  |
| 7 | 0 | -3.517040 | -3.087037 | 0.000000  |
| 6 | 0 | -4.866844 | -2.908008 | 0.000000  |
| 8 | 0 | -5.644116 | -3.870327 | 0.000000  |
| 6 | 0 | -5.340942 | -1.474487 | 0.000000  |
| 6 | 0 | 0.407438  | -6.041678 | 0.000000  |
| 1 | 0 | -1.664569 | -6.504991 | 0.000000  |
| 1 | 0 | -3.402447 | -4.981102 | 0.872860  |
| 1 | 0 | -3.402447 | -4.981102 | -0.872860 |

|   |   |           |           |           |
|---|---|-----------|-----------|-----------|
| 1 | 0 | -2.862272 | -2.313434 | 0.000000  |
| 1 | 0 | -4.510506 | -0.776428 | 0.000000  |
| 1 | 0 | -5.963640 | -1.316128 | -0.878585 |
| 1 | 0 | -5.963640 | -1.316128 | 0.878585  |
| 1 | 0 | 0.683839  | -6.608894 | 0.887769  |
| 1 | 0 | 0.683839  | -6.608894 | -0.887769 |
| 1 | 0 | 0.943627  | -5.099797 | 0.000000  |

**B:**

|   |   |           |           |           |
|---|---|-----------|-----------|-----------|
| 7 | 0 | 4.655445  | -1.195068 | 0.000000  |
| 6 | 0 | 4.914013  | 0.120930  | 0.000000  |
| 8 | 0 | 6.043437  | 0.648132  | 0.000000  |
| 6 | 0 | 3.665539  | 0.996620  | 0.000000  |
| 7 | 0 | 4.076913  | 2.377927  | 0.000000  |
| 6 | 0 | 3.175776  | 3.376572  | 0.000000  |
| 8 | 0 | 1.951160  | 3.155534  | 0.000000  |
| 6 | 0 | 3.726802  | 4.782791  | 0.000000  |
| 6 | 0 | 5.682807  | -2.221551 | 0.000000  |
| 1 | 0 | 3.677842  | -1.475398 | 0.000000  |
| 1 | 0 | 3.052253  | 0.766874  | 0.871631  |
| 1 | 0 | 3.052253  | 0.766874  | -0.871631 |
| 1 | 0 | 5.075946  | 2.533595  | 0.000000  |
| 1 | 0 | 4.813895  | 4.811655  | 0.000000  |
| 1 | 0 | 3.353282  | 5.303379  | -0.879267 |
| 1 | 0 | 3.353282  | 5.303379  | 0.879267  |
| 1 | 0 | 5.588013  | -2.847682 | 0.886013  |
| 1 | 0 | 5.588013  | -2.847682 | -0.886013 |
| 1 | 0 | 6.661175  | -1.756522 | 0.000000  |
| 8 | 0 | 8.668457  | -0.518246 | 0.000000  |
| 1 | 0 | 9.355041  | 0.153307  | 0.000000  |
| 1 | 0 | 7.837113  | -0.019724 | 0.000000  |
| 7 | 0 | -0.379766 | -0.784516 | 0.000000  |
| 6 | 0 | 0.585325  | -1.723049 | 0.000000  |
| 8 | 0 | 1.793289  | -1.411185 | 0.000000  |
| 6 | 0 | 0.000000  | 0.606865  | 0.000000  |
| 6 | 0 | -1.228432 | 1.503011  | 0.000000  |
| 8 | 0 | -2.380883 | 1.039399  | 0.000000  |
| 7 | 0 | -0.921197 | 2.815278  | 0.000000  |
| 6 | 0 | 0.139352  | -3.162554 | 0.000000  |
| 6 | 0 | -1.921695 | 3.862222  | 0.000000  |
| 1 | 0 | -1.366570 | -1.022729 | 0.000000  |
| 1 | 0 | 0.616027  | 0.840056  | 0.870317  |
| 1 | 0 | 0.616027  | 0.840056  | -0.870317 |
| 1 | 0 | 0.061107  | 3.072956  | 0.000000  |
| 1 | 0 | -0.941871 | -3.247547 | 0.000000  |
| 1 | 0 | 0.554283  | -3.652473 | -0.879161 |
| 1 | 0 | 0.554283  | -3.652473 | 0.879161  |
| 1 | 0 | -1.823924 | 4.487906  | -0.886462 |
| 1 | 0 | -1.823924 | 4.487906  | 0.886462  |
| 1 | 0 | -2.900935 | 3.397410  | 0.000000  |
| 7 | 0 | -4.557151 | -4.064244 | 0.000000  |
| 6 | 0 | -4.235359 | -2.745039 | 0.000000  |
| 8 | 0 | -3.072148 | -2.322737 | 0.000000  |

|   |   |           |           |           |
|---|---|-----------|-----------|-----------|
| 6 | 0 | -5.449337 | -1.834602 | 0.000000  |
| 7 | 0 | -5.067632 | -0.450167 | 0.000000  |
| 6 | 0 | -6.064779 | 0.477200  | 0.000000  |
| 8 | 0 | -7.255459 | 0.142331  | 0.000000  |
| 6 | 0 | -5.622204 | 1.920901  | 0.000000  |
| 6 | 0 | -3.576319 | -5.130851 | 0.000000  |
| 1 | 0 | -5.534141 | -4.309220 | 0.000000  |
| 1 | 0 | -6.069816 | -2.061477 | 0.872985  |
| 1 | 0 | -6.069816 | -2.061477 | -0.872985 |
| 1 | 0 | -4.085948 | -0.198736 | 0.000000  |
| 1 | 0 | -4.541058 | 2.010708  | 0.000000  |
| 1 | 0 | -6.038756 | 2.410039  | -0.878615 |
| 1 | 0 | -6.038756 | 2.410039  | 0.878615  |
| 1 | 0 | -3.679272 | -5.753360 | 0.887772  |
| 1 | 0 | -3.679272 | -5.753360 | -0.887772 |
| 1 | 0 | -2.593825 | -4.673366 | 0.000000  |

**C:**

|   |   |           |           |           |
|---|---|-----------|-----------|-----------|
| 7 | 0 | 4.887920  | -0.509817 | 0.000000  |
| 6 | 0 | 4.939108  | 0.836278  | 0.000000  |
| 8 | 0 | 5.991720  | 1.498943  | 0.000000  |
| 6 | 0 | 3.567523  | 1.498319  | 0.000000  |
| 7 | 0 | 3.707027  | 2.933680  | 0.000000  |
| 6 | 0 | 2.616822  | 3.721594  | 0.000000  |
| 8 | 0 | 1.463443  | 3.249256  | 0.000000  |
| 6 | 0 | 2.873590  | 5.209598  | 0.000000  |
| 6 | 0 | 6.086961  | -1.322422 | 0.000000  |
| 1 | 0 | 3.973955  | -0.955139 | 0.000000  |
| 1 | 0 | 3.001303  | 1.160058  | 0.869164  |
| 1 | 0 | 3.001303  | 1.160058  | -0.869164 |
| 1 | 0 | 4.638612  | 3.337234  | 0.000000  |
| 1 | 0 | 3.934563  | 5.446292  | 0.000000  |
| 1 | 0 | 2.400589  | 5.643980  | -0.878682 |
| 1 | 0 | 2.400589  | 5.643980  | 0.878682  |
| 1 | 0 | 6.125212  | -1.954760 | 0.886330  |
| 1 | 0 | 6.125212  | -1.954760 | -0.886330 |
| 1 | 0 | 6.941322  | -0.652984 | 0.000000  |
| 8 | 0 | 6.420018  | 4.301000  | 0.000000  |
| 1 | 0 | 6.611302  | 3.712227  | 0.740905  |
| 1 | 0 | 6.611302  | 3.712227  | -0.740905 |
| 7 | 0 | -0.133320 | -0.984839 | 0.000000  |
| 6 | 0 | 0.978555  | -1.743094 | 0.000000  |
| 8 | 0 | 2.115540  | -1.229658 | 0.000000  |
| 6 | 0 | 0.000000  | 0.451611  | 0.000000  |
| 6 | 0 | -1.366170 | 1.119743  | 0.000000  |
| 8 | 0 | -2.419770 | 0.460373  | 0.000000  |
| 7 | 0 | -1.293908 | 2.464945  | 0.000000  |
| 6 | 0 | 0.786036  | -3.238201 | 0.000000  |
| 6 | 0 | -2.462570 | 3.319782  | 0.000000  |
| 1 | 0 | -1.064281 | -1.389380 | 0.000000  |
| 1 | 0 | 0.566938  | 0.788386  | 0.869480  |
| 1 | 0 | 0.566938  | 0.788386  | -0.869480 |
| 1 | 0 | -0.370965 | 2.891230  | 0.000000  |

|   |   |           |           |           |
|---|---|-----------|-----------|-----------|
| 1 | 0 | -0.264535 | -3.507760 | 0.000000  |
| 1 | 0 | 1.278837  | -3.649672 | -0.879227 |
| 1 | 0 | 1.278837  | -3.649672 | 0.879227  |
| 1 | 0 | -2.475791 | 3.953237  | -0.886315 |
| 1 | 0 | -2.475791 | 3.953237  | 0.886315  |
| 1 | 0 | -3.345599 | 2.691150  | 0.000000  |
| 7 | 0 | -3.684886 | -4.941296 | 0.000000  |
| 6 | 0 | -3.594001 | -3.586145 | 0.000000  |
| 8 | 0 | -2.520387 | -2.971092 | 0.000000  |
| 6 | 0 | -4.946050 | -2.897403 | 0.000000  |
| 7 | 0 | -4.807971 | -1.468040 | 0.000000  |
| 6 | 0 | -5.950060 | -0.726442 | 0.000000  |
| 8 | 0 | -7.065218 | -1.261698 | 0.000000  |
| 6 | 0 | -5.762554 | 0.771795  | 0.000000  |
| 6 | 0 | -2.535271 | -5.823183 | 0.000000  |
| 1 | 0 | -4.605331 | -5.350285 | 0.000000  |
| 1 | 0 | -5.518376 | -3.227570 | 0.872963  |
| 1 | 0 | -5.518376 | -3.227570 | -0.872963 |
| 1 | 0 | -3.884336 | -1.050686 | 0.000000  |
| 1 | 0 | -4.712855 | 1.045750  | 0.000000  |
| 1 | 0 | -6.256979 | 1.182034  | -0.878647 |
| 1 | 0 | -6.256979 | 1.182034  | 0.878647  |
| 1 | 0 | -2.529360 | -6.454209 | 0.887770  |
| 1 | 0 | -2.529360 | -6.454209 | -0.887770 |
| 1 | 0 | -1.646221 | -5.203248 | 0.000000  |

**D:**

|   |   |           |           |           |
|---|---|-----------|-----------|-----------|
| 7 | 0 | 3.891295  | 4.057455  | 0.000000  |
| 6 | 0 | 2.867268  | 4.935269  | 0.000000  |
| 8 | 0 | 2.985417  | 6.170151  | 0.000000  |
| 6 | 0 | 1.490310  | 4.280299  | 0.000000  |
| 7 | 0 | 0.498662  | 5.326343  | 0.000000  |
| 6 | 0 | -0.816006 | 5.047508  | 0.000000  |
| 8 | 0 | -1.239327 | 3.876512  | 0.000000  |
| 6 | 0 | -1.757239 | 6.228431  | 0.000000  |
| 6 | 0 | 5.271714  | 4.495854  | 0.000000  |
| 1 | 0 | 3.670749  | 3.066373  | 0.000000  |
| 1 | 0 | 1.384323  | 3.634322  | 0.871929  |
| 1 | 0 | 1.384323  | 3.634322  | -0.871929 |
| 1 | 0 | 0.868514  | 6.268273  | 0.000000  |
| 1 | 0 | -1.237642 | 7.183741  | 0.000000  |
| 1 | 0 | -2.395117 | 6.166009  | -0.879156 |
| 1 | 0 | -2.395117 | 6.166009  | 0.879156  |
| 1 | 0 | 5.793056  | 4.136053  | 0.886479  |
| 1 | 0 | 5.793056  | 4.136053  | -0.886479 |
| 1 | 0 | 5.272724  | 5.581398  | 0.000000  |
| 7 | 0 | 1.012408  | -0.112246 | 0.000000  |
| 6 | 0 | 2.310050  | 0.248252  | 0.000000  |
| 8 | 0 | 2.652210  | 1.447269  | 0.000000  |
| 6 | 0 | 0.000000  | 0.914986  | 0.000000  |
| 6 | 0 | -1.391465 | 0.301596  | 0.000000  |
| 8 | 0 | -1.567864 | -0.929085 | 0.000000  |
| 7 | 0 | -2.371937 | 1.224507  | 0.000000  |

|   |   |           |           |           |
|---|---|-----------|-----------|-----------|
| 6 | 0 | 3.326220  | -0.865280 | 0.000000  |
| 6 | 0 | -3.780801 | 0.887949  | 0.000000  |
| 1 | 0 | 0.720523  | -1.084079 | 0.000000  |
| 1 | 0 | 0.107588  | 1.565121  | 0.870075  |
| 1 | 0 | 0.107588  | 1.565121  | -0.870075 |
| 1 | 0 | -2.101480 | 2.203782  | 0.000000  |
| 1 | 0 | 2.852522  | -1.840965 | 0.000000  |
| 1 | 0 | 3.958873  | -0.755849 | -0.879118 |
| 1 | 0 | 3.958873  | -0.755849 | 0.879118  |
| 1 | 0 | -4.271069 | 1.288503  | -0.886421 |
| 1 | 0 | -4.271069 | 1.288503  | 0.886421  |
| 1 | 0 | -3.874920 | -0.191607 | 0.000000  |
| 7 | 0 | 1.720050  | -5.378557 | 0.000000  |
| 6 | 0 | 0.747254  | -4.432141 | 0.000000  |
| 8 | 0 | 0.971144  | -3.215532 | 0.000000  |
| 6 | 0 | -0.653980 | -5.015213 | 0.000000  |
| 7 | 0 | -1.651081 | -3.979075 | 0.000000  |
| 6 | 0 | -2.952043 | -4.353011 | 0.000000  |
| 8 | 0 | -3.262885 | -5.559825 | 0.000000  |
| 6 | 0 | -3.976211 | -3.250089 | 0.000000  |
| 6 | 0 | 3.137069  | -5.073226 | 0.000000  |
| 1 | 0 | 1.436943  | -6.345200 | 0.000000  |
| 1 | 0 | -0.777570 | -5.662783 | 0.873497  |
| 1 | 0 | -0.777570 | -5.662783 | -0.873497 |
| 1 | 0 | -1.367369 | -3.004684 | 0.000000  |
| 1 | 0 | -3.504212 | -2.274076 | 0.000000  |
| 1 | 0 | -4.613787 | -3.368979 | -0.873592 |
| 1 | 0 | -4.613787 | -3.368979 | 0.873592  |
| 1 | 0 | 3.620844  | -5.477738 | 0.887870  |
| 1 | 0 | 3.620844  | -5.477738 | -0.887870 |
| 1 | 0 | 3.240419  | -3.994381 | 0.000000  |
| 8 | 0 | -6.116628 | -5.600478 | 0.000000  |
| 1 | 0 | -5.149790 | -5.703108 | 0.000000  |
| 1 | 0 | -6.446413 | -6.502974 | 0.000000  |

**E:**

|   |   |           |           |           |
|---|---|-----------|-----------|-----------|
| 7 | 0 | -4.207260 | 3.527731  | 0.000000  |
| 6 | 0 | -5.073356 | 2.494091  | 0.000000  |
| 8 | 0 | -6.309739 | 2.598145  | 0.000000  |
| 6 | 0 | -4.403285 | 1.124151  | 0.000000  |
| 7 | 0 | -5.439176 | 0.121802  | 0.000000  |
| 6 | 0 | -5.148448 | -1.190237 | 0.000000  |
| 8 | 0 | -3.974388 | -1.604510 | 0.000000  |
| 6 | 0 | -6.321809 | -2.141393 | 0.000000  |
| 6 | 0 | -4.661447 | 4.902944  | 0.000000  |
| 1 | 0 | -3.213375 | 3.318206  | 0.000000  |
| 1 | 0 | -3.756195 | 1.025221  | 0.871854  |
| 1 | 0 | -3.756195 | 1.025221  | -0.871854 |
| 1 | 0 | -6.384615 | 0.482664  | 0.000000  |
| 1 | 0 | -7.281398 | -1.629720 | 0.000000  |
| 1 | 0 | -6.254037 | -2.778672 | -0.879203 |
| 1 | 0 | -6.254037 | -2.778672 | 0.879203  |
| 1 | 0 | -4.307448 | 5.428403  | 0.886411  |

|   |   |           |           |           |
|---|---|-----------|-----------|-----------|
| 1 | 0 | -4.307448 | 5.428403  | -0.886411 |
| 1 | 0 | -5.746956 | 4.891836  | 0.000000  |
| 7 | 0 | 0.000000  | 0.713552  | 0.000000  |
| 6 | 0 | -0.386216 | 2.003858  | 0.000000  |
| 8 | 0 | -1.593178 | 2.319579  | 0.000000  |
| 6 | 0 | -1.012103 | -0.314051 | 0.000000  |
| 6 | 0 | -0.385546 | -1.699065 | 0.000000  |
| 8 | 0 | 0.845366  | -1.867737 | 0.000000  |
| 7 | 0 | -1.300674 | -2.688552 | 0.000000  |
| 6 | 0 | 0.704513  | 3.043786  | 0.000000  |
| 6 | 0 | -0.947193 | -4.092602 | 0.000000  |
| 1 | 0 | 0.978953  | 0.443265  | 0.000000  |
| 1 | 0 | -1.664107 | -0.214836 | 0.869880  |
| 1 | 0 | -1.664107 | -0.214836 | -0.869880 |
| 1 | 0 | -2.282695 | -2.428742 | 0.000000  |
| 1 | 0 | 1.690358  | 2.591688  | 0.000000  |
| 1 | 0 | 0.580052  | 3.673933  | -0.879015 |
| 1 | 0 | 0.580052  | 3.673933  | 0.879015  |
| 1 | 0 | -1.341157 | -4.588697 | -0.886359 |
| 1 | 0 | -1.341157 | -4.588697 | 0.886359  |
| 1 | 0 | 0.133947  | -4.171568 | 0.000000  |
| 7 | 0 | 5.236326  | 1.525104  | 0.000000  |
| 6 | 0 | 4.296192  | 0.553790  | 0.000000  |
| 8 | 0 | 3.072142  | 0.755974  | 0.000000  |
| 6 | 0 | 4.896809  | -0.840792 | 0.000000  |
| 7 | 0 | 3.891456  | -1.864621 | 0.000000  |
| 6 | 0 | 4.322394  | -3.153766 | 0.000000  |
| 8 | 0 | 5.531015  | -3.428333 | 0.000000  |
| 6 | 0 | 3.246439  | -4.212456 | 0.000000  |
| 6 | 0 | 4.918081  | 2.937669  | 0.000000  |
| 1 | 0 | 6.209125  | 1.235141  | 0.000000  |
| 1 | 0 | 5.548653  | -0.949256 | 0.870842  |
| 1 | 0 | 5.548653  | -0.949256 | -0.870842 |
| 1 | 0 | 2.909592  | -1.611939 | 0.000000  |
| 1 | 0 | 2.253743  | -3.774738 | 0.000000  |
| 1 | 0 | 3.378730  | -4.841297 | -0.878567 |
| 1 | 0 | 3.378730  | -4.841297 | 0.878567  |
| 1 | 0 | 5.321913  | 3.425534  | 0.886444  |
| 1 | 0 | 5.321913  | 3.425534  | -0.886444 |
| 1 | 0 | 3.838708  | 3.039722  | 0.000000  |
| 8 | 0 | 7.962571  | 0.241146  | 0.000000  |
| 1 | 0 | 8.038316  | -0.350627 | 0.757174  |
| 1 | 0 | 8.038316  | -0.350627 | -0.757174 |

**F:**

|   |   |           |           |          |
|---|---|-----------|-----------|----------|
| 7 | 0 | -5.052244 | 0.517632  | 0.000000 |
| 6 | 0 | -5.181941 | -0.817022 | 0.000000 |
| 8 | 0 | -6.255122 | -1.451418 | 0.000000 |
| 6 | 0 | -3.854722 | -1.567949 | 0.000000 |
| 7 | 0 | -4.130899 | -2.982631 | 0.000000 |
| 6 | 0 | -3.137599 | -3.889484 | 0.000000 |
| 8 | 0 | -1.939948 | -3.551508 | 0.000000 |
| 6 | 0 | -3.550268 | -5.342342 | 0.000000 |

|   |   |           |           |           |
|---|---|-----------|-----------|-----------|
| 6 | 0 | -6.174098 | 1.439946  | 0.000000  |
| 1 | 0 | -4.106241 | 0.891506  | 0.000000  |
| 1 | 0 | -3.266141 | -1.280150 | 0.871379  |
| 1 | 0 | -3.266141 | -1.280150 | -0.871379 |
| 1 | 0 | -5.110343 | -3.233631 | 0.000000  |
| 1 | 0 | -4.629502 | -5.476137 | 0.000000  |
| 1 | 0 | -3.128267 | -5.824515 | -0.879249 |
| 1 | 0 | -3.128267 | -5.824515 | 0.879249  |
| 1 | 0 | -6.140041 | 2.072320  | 0.885978  |
| 1 | 0 | -6.140041 | 2.072320  | -0.885978 |
| 1 | 0 | -7.103024 | 0.882702  | 0.000000  |
| 8 | 0 | -8.980608 | -0.544919 | 0.000000  |
| 1 | 0 | -9.596291 | -1.282097 | 0.000000  |
| 1 | 0 | -8.103783 | -0.958537 | 0.000000  |
| 7 | 0 | 0.000000  | 0.603659  | 0.000000  |
| 6 | 0 | -1.057249 | 1.437227  | 0.000000  |
| 8 | 0 | -2.226134 | 0.999624  | 0.000000  |
| 6 | 0 | -0.239161 | -0.818725 | 0.000000  |
| 6 | 0 | 1.068378  | -1.593927 | 0.000000  |
| 8 | 0 | 2.173205  | -1.026268 | 0.000000  |
| 7 | 0 | 0.886305  | -2.929679 | 0.000000  |
| 6 | 0 | -0.764927 | 2.915189  | 0.000000  |
| 6 | 0 | 1.981624  | -3.876750 | 0.000000  |
| 1 | 0 | 0.956657  | 0.945055  | 0.000000  |
| 1 | 0 | -0.830100 | -1.111315 | 0.869936  |
| 1 | 0 | -0.830100 | -1.111315 | -0.869936 |
| 1 | 0 | -0.066897 | -3.279785 | 0.000000  |
| 1 | 0 | 0.301394  | 3.113147  | 0.000000  |
| 1 | 0 | -1.229648 | 3.358544  | -0.879033 |
| 1 | 0 | -1.229648 | 3.358544  | 0.879033  |
| 1 | 0 | 1.943964  | -4.508986 | -0.886441 |
| 1 | 0 | 1.943964  | -4.508986 | 0.886441  |
| 1 | 0 | 2.912119  | -3.320599 | 0.000000  |
| 7 | 0 | 3.813814  | 4.275143  | 0.000000  |
| 6 | 0 | 3.603662  | 2.939962  | 0.000000  |
| 8 | 0 | 2.486006  | 2.401035  | 0.000000  |
| 6 | 0 | 4.897294  | 2.144765  | 0.000000  |
| 7 | 0 | 4.663930  | 0.728922  | 0.000000  |
| 6 | 0 | 5.757967  | -0.077847 | 0.000000  |
| 8 | 0 | 6.904495  | 0.392681  | 0.000000  |
| 6 | 0 | 5.487137  | -1.562897 | 0.000000  |
| 6 | 0 | 2.741188  | 5.247887  | 0.000000  |
| 1 | 0 | 4.776372  | 4.597599  | 0.000000  |
| 1 | 0 | 5.492779  | 2.431099  | 0.870851  |
| 1 | 0 | 5.492779  | 2.431099  | -0.870851 |
| 1 | 0 | 3.715440  | 0.371102  | 0.000000  |
| 1 | 0 | 4.423466  | -1.776631 | 0.000000  |
| 1 | 0 | 5.957292  | -2.000932 | -0.878574 |
| 1 | 0 | 5.957292  | -2.000932 | 0.878574  |
| 1 | 0 | 2.791160  | 5.879189  | 0.886451  |
| 1 | 0 | 2.791160  | 5.879189  | -0.886451 |
| 1 | 0 | 1.799332  | 4.710956  | 0.000000  |
| 8 | 0 | 6.781490  | 4.794749  | 0.000000  |
| 1 | 0 | 7.186089  | 4.356758  | 0.757369  |
| 1 | 0 | 7.186089  | 4.356758  | -0.757369 |



**G:**

|   |   |           |           |           |
|---|---|-----------|-----------|-----------|
| 7 | 0 | 4.215553  | 3.231823  | 0.000000  |
| 6 | 0 | 3.325624  | 4.243115  | 0.000000  |
| 8 | 0 | 3.632708  | 5.448408  | 0.000000  |
| 6 | 0 | 1.875318  | 3.778882  | 0.000000  |
| 7 | 0 | 0.988310  | 4.915936  | 0.000000  |
| 6 | 0 | -0.344742 | 4.736269  | 0.000000  |
| 8 | 0 | -0.854703 | 3.598928  | 0.000000  |
| 6 | 0 | -1.183843 | 5.991377  | 0.000000  |
| 6 | 0 | 5.644686  | 3.467983  | 0.000000  |
| 1 | 0 | 3.859545  | 2.279802  | 0.000000  |
| 1 | 0 | 1.697297  | 3.143666  | 0.869098  |
| 1 | 0 | 1.697297  | 3.143666  | -0.869098 |
| 1 | 0 | 1.386326  | 5.849797  | 0.000000  |
| 1 | 0 | -0.578037 | 6.893985  | 0.000000  |
| 1 | 0 | -1.826000 | 5.980427  | -0.878625 |
| 1 | 0 | -1.826000 | 5.980427  | 0.878625  |
| 1 | 0 | 6.107704  | 3.035785  | 0.886362  |
| 1 | 0 | 6.107704  | 3.035785  | -0.886362 |
| 1 | 0 | 5.803179  | 4.541714  | 0.000000  |
| 8 | 0 | 2.014349  | 7.778056  | 0.000000  |
| 1 | 0 | 2.557251  | 7.480157  | 0.740801  |
| 1 | 0 | 2.557251  | 7.480157  | -0.740801 |
| 7 | 0 | 0.891137  | -0.568183 | 0.000000  |
| 6 | 0 | 2.220084  | -0.355286 | 0.000000  |
| 8 | 0 | 2.693977  | 0.798508  | 0.000000  |
| 6 | 0 | 0.000000  | 0.566292  | 0.000000  |
| 6 | 0 | -1.451142 | 0.111073  | 0.000000  |
| 8 | 0 | -1.761642 | -1.093178 | 0.000000  |
| 7 | 0 | -2.323804 | 1.136152  | 0.000000  |
| 6 | 0 | 3.106762  | -1.574498 | 0.000000  |
| 6 | 0 | -3.760985 | 0.956102  | 0.000000  |
| 1 | 0 | 0.492217  | -1.501250 | 0.000000  |
| 1 | 0 | 0.179956  | 1.200773  | 0.869376  |
| 1 | 0 | 0.179956  | 1.200773  | -0.869376 |
| 1 | 0 | -1.946342 | 2.080111  | 0.000000  |
| 1 | 0 | 2.528073  | -2.491819 | 0.000000  |
| 1 | 0 | 3.747563  | -1.535696 | -0.879203 |
| 1 | 0 | 3.747563  | -1.535696 | 0.879203  |
| 1 | 0 | -4.204428 | 1.408191  | -0.886347 |
| 1 | 0 | -4.204428 | 1.408191  | 0.886347  |
| 1 | 0 | -3.973516 | -0.106500 | 0.000000  |
| 7 | 0 | 1.009670  | -5.882071 | 0.000000  |
| 6 | 0 | 0.149080  | -4.832366 | 0.000000  |
| 8 | 0 | 0.508051  | -3.648607 | 0.000000  |
| 6 | 0 | -1.308669 | -5.254874 | 0.000000  |
| 7 | 0 | -2.183866 | -4.113980 | 0.000000  |
| 6 | 0 | -3.518439 | -4.341035 | 0.000000  |
| 8 | 0 | -3.961173 | -5.505902 | 0.000000  |
| 6 | 0 | -4.413833 | -3.131160 | 0.000000  |
| 6 | 0 | 2.451884  | -5.737322 | 0.000000  |
| 1 | 0 | 0.619790  | -6.810802 | 0.000000  |

|   |   |           |           |           |
|---|---|-----------|-----------|-----------|
| 1 | 0 | -1.503564 | -5.884600 | 0.873545  |
| 1 | 0 | -1.503564 | -5.884600 | -0.873545 |
| 1 | 0 | -1.793628 | -3.177104 | 0.000000  |
| 1 | 0 | -3.836494 | -2.213523 | 0.000000  |
| 1 | 0 | -5.060583 | -3.178683 | -0.873651 |
| 1 | 0 | -5.060583 | -3.178683 | 0.873651  |
| 1 | 0 | 2.887488  | -6.193373 | 0.887868  |
| 1 | 0 | 2.887488  | -6.193373 | -0.887868 |
| 1 | 0 | 2.675300  | -4.676794 | 0.000000  |
| 8 | 0 | -6.802596 | -5.230723 | 0.000000  |
| 1 | 0 | -5.852994 | -5.438809 | 0.000000  |
| 1 | 0 | -7.230276 | -6.091069 | 0.000000  |

## H:

|   |   |           |           |           |
|---|---|-----------|-----------|-----------|
| 7 | 0 | 2.964302  | -3.426260 | 0.000000  |
| 6 | 0 | 3.908034  | -2.475971 | 0.000000  |
| 8 | 0 | 5.141548  | -2.680649 | 0.000000  |
| 6 | 0 | 3.347055  | -1.060043 | 0.000000  |
| 7 | 0 | 4.415139  | -0.091302 | 0.000000  |
| 6 | 0 | 4.134304  | 1.225460  | 0.000000  |
| 8 | 0 | 2.961861  | 1.646288  | 0.000000  |
| 6 | 0 | 5.322228  | 2.157207  | 0.000000  |
| 6 | 0 | 3.243929  | -4.851494 | 0.000000  |
| 1 | 0 | 1.993694  | -3.118332 | 0.000000  |
| 1 | 0 | 2.700375  | -0.928356 | 0.868794  |
| 1 | 0 | 2.700375  | -0.928356 | -0.868794 |
| 1 | 0 | 5.376126  | -0.414673 | 0.000000  |
| 1 | 0 | 6.268546  | 1.622234  | 0.000000  |
| 1 | 0 | 5.262472  | 2.796531  | -0.878685 |
| 1 | 0 | 5.262472  | 2.796531  | 0.878685  |
| 1 | 0 | 2.814537  | -5.316749 | 0.885924  |
| 1 | 0 | 2.814537  | -5.316749 | -0.885924 |
| 1 | 0 | 4.314583  | -5.013894 | 0.000000  |
| 8 | 0 | 6.683957  | -5.112439 | 0.000000  |
| 1 | 0 | 7.624092  | -4.915445 | 0.000000  |
| 1 | 0 | 6.244158  | -4.249199 | 0.000000  |
| 8 | 0 | 7.358588  | -0.900588 | 0.000000  |
| 1 | 0 | 7.082482  | -1.450070 | 0.744032  |
| 1 | 0 | 7.082482  | -1.450070 | -0.744032 |
| 7 | 0 | -1.061086 | -0.405175 | 0.000000  |
| 6 | 0 | -0.741818 | -1.711938 | 0.000000  |
| 8 | 0 | 0.448130  | -2.088756 | 0.000000  |
| 6 | 0 | 0.000000  | 0.572238  | 0.000000  |
| 6 | 0 | -0.565951 | 1.983596  | 0.000000  |
| 8 | 0 | -1.789490 | 2.200523  | 0.000000  |
| 7 | 0 | 0.389558  | 2.933512  | 0.000000  |
| 6 | 0 | -1.882848 | -2.696205 | 0.000000  |
| 6 | 0 | 0.095272  | 4.351409  | 0.000000  |
| 1 | 0 | -2.023875 | -0.083039 | 0.000000  |
| 1 | 0 | 0.646332  | 0.442035  | 0.869553  |
| 1 | 0 | 0.646332  | 0.442035  | -0.869553 |
| 1 | 0 | 1.359735  | 2.631045  | 0.000000  |
| 1 | 0 | -2.844652 | -2.195019 | 0.000000  |

|   |   |           |           |           |
|---|---|-----------|-----------|-----------|
| 1 | 0 | -1.790847 | -3.331583 | -0.879204 |
| 1 | 0 | -1.790847 | -3.331583 | 0.879204  |
| 1 | 0 | 0.509848  | 4.830297  | -0.886388 |
| 1 | 0 | 0.509848  | 4.830297  | 0.886388  |
| 1 | 0 | -0.981445 | 4.476321  | 0.000000  |
| 7 | 0 | -6.341600 | -0.969551 | 0.000000  |
| 6 | 0 | -5.367998 | -0.022933 | 0.000000  |
| 8 | 0 | -4.158246 | -0.283550 | 0.000000  |
| 6 | 0 | -5.912854 | 1.393214  | 0.000000  |
| 7 | 0 | -4.854652 | 2.364012  | 0.000000  |
| 6 | 0 | -5.208320 | 3.679062  | 0.000000  |
| 8 | 0 | -6.395471 | 4.026370  | 0.000000  |
| 6 | 0 | -4.067559 | 4.668285  | 0.000000  |
| 6 | 0 | -6.077512 | -2.394263 | 0.000000  |
| 1 | 0 | -7.299426 | -0.657941 | 0.000000  |
| 1 | 0 | -6.559219 | 1.530398  | 0.872927  |
| 1 | 0 | -6.559219 | 1.530398  | -0.872927 |
| 1 | 0 | -3.888881 | 2.056880  | 0.000000  |
| 1 | 0 | -3.103429 | 4.170919  | 0.000000  |
| 1 | 0 | -4.161244 | 5.303910  | -0.878607 |
| 1 | 0 | -4.161244 | 5.303910  | 0.878607  |
| 1 | 0 | -6.495512 | -2.866942 | 0.887766  |
| 1 | 0 | -6.495512 | -2.866942 | -0.887766 |
| 1 | 0 | -5.002094 | -2.528781 | 0.000000  |

**I:**

|   |   |           |           |           |
|---|---|-----------|-----------|-----------|
| 7 | 0 | -3.396923 | 4.775508  | 0.000000  |
| 6 | 0 | -4.487757 | 3.982337  | 0.000000  |
| 8 | 0 | -5.661934 | 4.382940  | 0.000000  |
| 6 | 0 | -4.169324 | 2.490964  | 0.000000  |
| 7 | 0 | -5.416765 | 1.768826  | 0.000000  |
| 6 | 0 | -5.451029 | 0.425306  | 0.000000  |
| 8 | 0 | -4.411106 | -0.259225 | 0.000000  |
| 6 | 0 | -6.818919 | -0.215169 | 0.000000  |
| 6 | 0 | -3.504474 | 6.219776  | 0.000000  |
| 1 | 0 | -2.483565 | 4.331531  | 0.000000  |
| 1 | 0 | -3.565400 | 2.238465  | 0.871896  |
| 1 | 0 | -3.565400 | 2.238465  | -0.871896 |
| 1 | 0 | -6.247238 | 2.347035  | 0.000000  |
| 1 | 0 | -7.626884 | 0.512701  | 0.000000  |
| 1 | 0 | -6.906619 | -0.849999 | -0.879209 |
| 1 | 0 | -6.906619 | -0.849999 | 0.879209  |
| 1 | 0 | -3.033859 | 6.643936  | 0.886440  |
| 1 | 0 | -3.033859 | 6.643936  | -0.886440 |
| 1 | 0 | -4.560384 | 6.471801  | 0.000000  |
| 7 | 0 | 0.000000  | 1.018557  | 0.000000  |
| 6 | 0 | -0.058512 | 2.364206  | 0.000000  |
| 8 | 0 | -1.150693 | 2.966578  | 0.000000  |
| 6 | 0 | -1.231617 | 0.268088  | 0.000000  |
| 6 | 0 | -0.958804 | -1.227649 | 0.000000  |
| 8 | 0 | 0.195758  | -1.688148 | 0.000000  |
| 7 | 0 | -2.085367 | -1.966135 | 0.000000  |
| 6 | 0 | 1.254448  | 3.104399  | 0.000000  |

|   |   |           |           |           |
|---|---|-----------|-----------|-----------|
| 6 | 0 | -2.085144 | -3.414412 | 0.000000  |
| 1 | 0 | 0.882552  | 0.516694  | 0.000000  |
| 1 | 0 | -1.839947 | 0.522380  | 0.869939  |
| 1 | 0 | -1.839947 | 0.522380  | -0.869939 |
| 1 | 0 | -2.974915 | -1.475532 | 0.000000  |
| 1 | 0 | 2.099039  | 2.423962  | 0.000000  |
| 1 | 0 | 1.288909  | 3.745692  | -0.879065 |
| 1 | 0 | 1.288909  | 3.745692  | 0.879065  |
| 1 | 0 | -2.588415 | -3.798749 | -0.886398 |
| 1 | 0 | -2.588415 | -3.798749 | 0.886398  |
| 1 | 0 | -1.056701 | -3.756233 | 0.000000  |
| 7 | 0 | 5.273822  | 0.513077  | 0.000000  |
| 6 | 0 | 4.126310  | -0.199949 | 0.000000  |
| 8 | 0 | 2.987442  | 0.291344  | 0.000000  |
| 6 | 0 | 4.367476  | -1.700141 | 0.000000  |
| 7 | 0 | 3.135692  | -2.440408 | 0.000000  |
| 6 | 0 | 3.215822  | -3.789431 | 0.000000  |
| 8 | 0 | 4.327809  | -4.357341 | 0.000000  |
| 6 | 0 | 1.917769  | -4.551118 | 0.000000  |
| 6 | 0 | 5.307473  | 1.961077  | 0.000000  |
| 1 | 0 | 6.147790  | -0.003217 | 0.000000  |
| 1 | 0 | 4.969710  | -1.968330 | 0.871505  |
| 1 | 0 | 4.969710  | -1.968330 | -0.871505 |
| 1 | 0 | 2.248034  | -1.947774 | 0.000000  |
| 1 | 0 | 1.067139  | -3.878852 | 0.000000  |
| 1 | 0 | 1.895447  | -5.199245 | -0.873687 |
| 1 | 0 | 1.895447  | -5.199245 | 0.873687  |
| 1 | 0 | 5.817705  | 2.335808  | 0.886518  |
| 1 | 0 | 5.817705  | 2.335808  | -0.886518 |
| 1 | 0 | 4.285227  | 2.322093  | 0.000000  |
| 8 | 0 | 3.747961  | -7.151377 | 0.000000  |
| 1 | 0 | 4.051301  | -6.227562 | 0.000000  |
| 1 | 0 | 4.559597  | -7.665419 | 0.000000  |
| 8 | 0 | 7.619249  | -1.359738 | 0.000000  |
| 1 | 0 | 7.591263  | -1.953549 | 0.758520  |
| 1 | 0 | 7.591263  | -1.953549 | -0.758520 |

**J:**

|   |   |          |          |           |
|---|---|----------|----------|-----------|
| 7 | 0 | 4.882013 | 1.668341 | 0.000000  |
| 6 | 0 | 4.419203 | 2.924976 | 0.000000  |
| 8 | 0 | 5.125834 | 3.956719 | 0.000000  |
| 6 | 0 | 2.898967 | 3.015421 | 0.000000  |
| 7 | 0 | 2.473508 | 4.393232 | 0.000000  |
| 6 | 0 | 1.161736 | 4.696526 | 0.000000  |
| 8 | 0 | 0.284115 | 3.812555 | 0.000000  |
| 6 | 0 | 0.820819 | 6.167243 | 0.000000  |
| 6 | 0 | 6.291993 | 1.319719 | 0.000000  |
| 1 | 0 | 4.193010 | 0.918491 | 0.000000  |
| 1 | 0 | 2.505786 | 2.485177 | 0.868631  |
| 1 | 0 | 2.505786 | 2.485177 | -0.868631 |
| 1 | 0 | 3.173560 | 5.126441 | 0.000000  |
| 1 | 0 | 1.706228 | 6.797970 | 0.000000  |
| 1 | 0 | 0.216356 | 6.383965 | -0.878656 |

|   |   |           |           |           |
|---|---|-----------|-----------|-----------|
| 1 | 0 | 0.216356  | 6.383965  | 0.878656  |
| 1 | 0 | 6.532136  | 0.733909  | 0.885909  |
| 1 | 0 | 6.532136  | 0.733909  | -0.885909 |
| 1 | 0 | 6.891680  | 2.221413  | 0.000000  |
| 8 | 0 | 7.981568  | 4.328715  | 0.000000  |
| 1 | 0 | 7.013349  | 4.293621  | 0.000000  |
| 1 | 0 | 8.198189  | 5.264574  | 0.000000  |
| 8 | 0 | 4.458554  | 6.719798  | 0.000000  |
| 1 | 0 | 4.833961  | 6.232280  | 0.743753  |
| 1 | 0 | 4.833961  | 6.232280  | -0.743753 |
| 7 | 0 | 0.439510  | -0.703346 | 0.000000  |
| 6 | 0 | 1.759921  | -0.961190 | 0.000000  |
| 8 | 0 | 2.599916  | -0.037584 | 0.000000  |
| 6 | 0 | 0.000000  | 0.670700  | 0.000000  |
| 6 | 0 | -1.517882 | 0.757282  | 0.000000  |
| 8 | 0 | -2.235818 | -0.257545 | 0.000000  |
| 7 | 0 | -1.971611 | 2.025458  | 0.000000  |
| 6 | 0 | 2.175950  | -2.409274 | 0.000000  |
| 6 | 0 | -3.379848 | 2.364091  | 0.000000  |
| 1 | 0 | -0.255283 | -1.444008 | 0.000000  |
| 1 | 0 | 0.391318  | 1.201982  | 0.869258  |
| 1 | 0 | 0.391318  | 1.201982  | -0.869258 |
| 1 | 0 | -1.285230 | 2.774838  | 0.000000  |
| 1 | 0 | 1.317927  | -3.072638 | 0.000000  |
| 1 | 0 | 2.791698  | -2.591557 | -0.879122 |
| 1 | 0 | 2.791698  | -2.591557 | 0.879122  |
| 1 | 0 | -3.635749 | 2.943308  | -0.886400 |
| 1 | 0 | -3.635749 | 2.943308  | 0.886400  |
| 1 | 0 | -3.952897 | 1.444223  | 0.000000  |
| 7 | 0 | -1.280944 | -5.708940 | 0.000000  |
| 6 | 0 | -1.705460 | -4.426522 | 0.000000  |
| 8 | 0 | -0.960986 | -3.434241 | 0.000000  |
| 6 | 0 | -3.220422 | -4.310252 | 0.000000  |
| 7 | 0 | -3.653014 | -2.939810 | 0.000000  |
| 6 | 0 | -4.983711 | -2.703420 | 0.000000  |
| 8 | 0 | -5.794851 | -3.652578 | 0.000000  |
| 6 | 0 | -5.422100 | -1.263651 | 0.000000  |
| 6 | 0 | 0.118726  | -6.081420 | 0.000000  |
| 1 | 0 | -1.987700 | -6.437640 | 0.000000  |
| 1 | 0 | -3.621748 | -4.833374 | 0.871446  |
| 1 | 0 | -3.621748 | -4.833374 | -0.871446 |
| 1 | 0 | -2.967360 | -2.191245 | 0.000000  |
| 1 | 0 | -4.570276 | -0.592903 | 0.000000  |
| 1 | 0 | -6.047258 | -1.091008 | -0.873641 |
| 1 | 0 | -6.047258 | -1.091008 | 0.873641  |
| 1 | 0 | 0.363194  | -6.665360 | 0.886508  |
| 1 | 0 | 0.363194  | -6.665360 | -0.886508 |
| 1 | 0 | 0.709670  | -5.172554 | 0.000000  |
| 8 | 0 | -8.375896 | -2.434661 | 0.000000  |
| 1 | 0 | -7.549692 | -2.947240 | 0.000000  |
| 1 | 0 | -9.066994 | -3.102020 | 0.000000  |
| 8 | 0 | -3.647725 | -7.552062 | 0.000000  |
| 1 | 0 | -4.219419 | -7.389410 | 0.758580  |
| 1 | 0 | -4.219419 | -7.389410 | -0.758580 |
